# Supplementary material
Source: PubMed Central journal article supplement (PMC2584686)
Supplement: 0805098105_ST2.pdf [file 0805098105_ST2.pdf]

**Table S2.** Oligonucleotides used in the construction of phage display libraries for this study

| Library | 5' oligonucleotide primer                                                                                                     |
|---------|-------------------------------------------------------------------------------------------------------------------------------|
| L2      | 5' CAG CCG <u>GCC ATG GCC</u> <b>NNK NNK</b> CCA <b>NNK NNK NNK</b> CAA <b>NCC</b> ACA CCC TGC TGC TTT GCC TAC ATT GCC CGC 3' |
| L5      | 5' CAG CCG <u>GCC ATG GCC</u> CAG GGT CCA CCT TTG ATG <b>NNK NNK NNK</b> TGC TGC TTT GCC TAC ATT GCC CGC 3'                   |
| L6      | 5' CAG CCG <u>GCC ATG GCC</u> CAG GGG CCA TTG <b>MTG NNK NNK NNK NNK NNK</b> TGC TGC TTT GCC TAC ATT GCC CGC 3'               |
|         | 5' CAG CCG <u>GCC ATG GCC</u> CAG GGG CCA TTG <b>RGY NNK NNK NNK NNK NNK</b> TGC TGC TTT GCC TAC ATT GCC CGC 3'               |
|         | 5' CAG CCG <u>GCC ATG GCC</u> CAG GGG CCA CCT <b>MTG NNK NNK NNK NNK NNK</b> TGC TGC TTT GCC TAC ATT GCC CGC 3'               |
|         | 5' CAG CCG <u>GCC ATG GCC</u> CAG GGG CCA CCT <b>RGY NNK NNK NNK NNK NNK</b> TGC TGC TTT GCC TAC ATT GCC CGC 3'               |
|         | 5' CAG CCG <u>GCC ATG GCC</u> CAG GGG CCA ATG <b>MTG NNK NNK NNK NNK NNK</b> TGC TGC TTT GCC TAC ATT GCC CGC 3'               |
|         | 5' CAG CCG <u>GCC ATG GCC</u> CAG GGG CCA ATG <b>RGY NNK NNK NNK NNK NNK</b> TGC TGC TTT GCC TAC ATT GCC CGC 3'               |
| L7      | 5' CAG CCG <u>GCC ATG GCC</u> CAG GGT CCA <b>NNK NNK NNK</b> TGG <b>NNK</b> CAG <b>NNK</b> TGC TGC TTT GCC TAC ATT GCC CGC 3' |
| L8      | 5' CAG CCG <u>GCC ATG GCC</u> CAG GGG CCA TTG <b>NNK NNK NNK NNK</b> CAG GTG TGC TGC TTT GCC TAC ATT GCC CGC                  |

The 5' Nco I site used to clone the PCR products into pHEN is underlined. Library L6 was made up as a mixture of six sublibraries, as shown. Degenerate codons are indicated in bold. N; any of A, C, T or G, K; either G or T, M; either A or C, R; either A or G, Y; either C or T.
